1  
2  
3  
4  
5  
6  
7  
8  
9  
10  
11  
12  
13  
14  
15  
16  
17  
18  
19  
20  
21  
22  
23  
24  
25  
26

## Engineering a dynamic, controllable infectivity switch in bacteriophage T7

Chutikarn Chitboonthavisuk<sup>1,2,3,\*</sup>, Chun Huai Luo<sup>1,2,\*</sup>, Phil Huss<sup>1,2,3</sup>, Mikayla Fernholz<sup>1</sup>  
and Srivatsan Raman<sup>1,2,4,§</sup>

- 1 Dept. of Biochemistry, Univ. of Wisconsin-Madison, Madison, WI, USA
- 2 Dept. of Bacteriology, Univ. of Wisconsin-Madison, Madison, WI, USA
- 3 Microbiology Doctoral Training Program, University of Wisconsin-Madison
- 4 Dept. of Chemical & Biological Eng., Univ. of Wisconsin-Madison, Madison, WI, USA
- \* These authors contributed equally to this work
- § Corresponding author: [sraman4@wisc.edu](mailto:sraman4@wisc.edu)

## 27 Abstract

28 Transcriptional repressors play an important role in regulating phage genomes. Here,  
29 we examined how synthetic regulation based on repressors can be to create a dynamic,  
30 controllable infectivity switch in bacteriophage T7. We engineered T7 by replacing a  
31 large region of the early phage genome with combinations of ligand-responsive  
32 promoters and ribosome binding sites (RBS) designed to control the phage RNA  
33 polymerase. Phages with the engineered switch showed virulence comparable to  
34 wildtype when not repressed, indicating the phage can be engineered without a loss of  
35 fitness. When repressed, the most effective switch used a TetR promoter and a weak  
36 RBS, resulting in a two-fold increase in latent period (time to lyse host) and change in  
37 phage titer. Further, phage activity could be tuned by varying inducer concentrations.  
38 Our study provides a proof of concept for a simple circuit for user control over phage  
39 infectivity.

40

## 41 Keywords

42 engineered bacteriophage, phage switch, ligand-responsive phages, phage genome  
43 editing

## 44 Introduction

45 Bacteriophages (or 'phages') are obligate parasites which require a bacterial host  
46 to complete their life cycle<sup>1</sup>. Once a phage infects its host, a choreographed cascade of  
47 phage genes is expressed to regulate subsequent steps in the phage's life cycle. Gene  
48 regulation in phages is frequently controlled by transcription repressors<sup>2</sup>. Transcription  
49 repressors act as switches that determine lifestyle decisions (e.g.: lytic vs. lysogenic) by  
50 silencing or activating different sets of genes. This is best exemplified in the  
51 transcription repressor-based genetic switch in phage lambda and other temperate  
52 phages with similar mechanisms (P22<sup>3</sup>, 434<sup>4</sup>,  $\phi$ C31<sup>5</sup>). Phage lambda persists in  
53 lysogenic state when transcription repressor CI represses early-stage lambda  
54 promoters, halting the transcriptional cascade of lytic genes. To activate lytic genes and  
55 release the prophage, a different repressor Cro, counteracts CI through differential  
56 binding at the same promoters. Transcription repressors also control activation and  
57 inactivation of non-integrating, episomal phage genomes, called pseudolysogens, in a  
58 nutrient dependent manner<sup>6</sup>. Transcription repressors are valuable tools for phages  
59 because their mechanism of gene regulation simply relies on steric obstruction of the  
60 RNA polymerase making it largely host-independent<sup>7</sup>. Further, a transcription repressor  
61 with strong affinity for its promoter can exert tight regulation over multiple open reading  
62 frames commonly found in long phage operons. While natural transcription regulation in  
63 phages is well studied, the engineering rules of introducing synthetic regulation into  
64 phages has not been developed.

65 Bacteria have long served as a popular chassis for exploring and prototyping  
66 synthetic regulation. This choice was largely driven by the availability of tools for

67 bacterial genome engineering and the application goal of bacterial biomanufacturing<sup>8</sup>. In  
68 recent years, a strong impetus has emerged for engineering phages, driven similarly by  
69 the availability of new tools for phage genome engineering and their potential  
70 applications in medicine and biotechnology<sup>9-11</sup>. Phage genomes can be now edited with  
71 high precision from single base to kilobase resolution using yeast cloning, homology-  
72 directed repair, and enzymatic recombination<sup>12,13</sup>. Phages engineered using these  
73 approaches could be powerful tools for killing antibiotic resistant bacteria and precisely  
74 manipulating microbiomes with applications in agriculture, livestock, medicine, and  
75 environment. Engineered phages have many advantages over their natural counterparts  
76 including superior efficacy, greater programmability, higher compositional stability, and  
77 easier scalability of production<sup>14</sup>. Despite this promise, even basic rules of engineering  
78 new regulation into phages have not been developed. This is in stark contrast to the  
79 wealth of research on engineering promoters, switches, circuits, and pathways in  
80 bacteria. Rules for engineering bacteria are not directly transferrable to phages due to  
81 substantial differences in genome compactness, compartmentalization of regulation and  
82 kinetics of growth and replication. Thus, rules for engineering new regulation for phages  
83 must be developed by systematic design-build-test-learn analysis.

84 With this goal in mind, we examined how bacterial transcription repressors could  
85 be used to engineer synthetic genetic regulation in phages. We sought to engineer a  
86 repressor-based infectivity switch that can dynamically control the activity of an obligate  
87 lytic phage in a ligand-dependent manner. Such a system would provide direct user  
88 control of phage activity which would otherwise undergo unregulated exponential  
89 amplification upon infecting a host<sup>15</sup>. Natural phages such as lambda are not ligand-

90 inducible but instead rely on stochastic differences in the concentration of CI vs. Cro to  
91 determine lysogenic vs. lytic choice<sup>16</sup>. A dynamic controllable infectivity switch would be  
92 a valuable tool for activating a phage at user-defined times to carry out microbiome  
93 editing in a natural or synthetic communities. Furthermore, inducible phage would be an  
94 effective form of biocontainment, as the phages only remain active while the ligand is  
95 provided but otherwise remain inert.

96 Here, we engineered an obligate lytic T7 phage with a synthetic regulatory switch  
97 to control its infection cycle in a ligand-dependent manner. To introduce synthetic  
98 regulation, we removed a large tract of native regulatory sequence from the phage  
99 genome and replaced this region with a short ligand-responsive bacterial promoter that  
100 regulates the T7 RNA polymerase gene. We saw no appreciable loss of fitness in the  
101 synthetic phage relative to wildtype T7 (T7\_WT). We tested different ligand-responsive  
102 bacterial promoters and ribosome-binding sites (RBS) representing a range of  
103 expression levels to characterize how these variables affect phage activity. We  
104 measured our ability to attenuate phage replication by measuring the phage latent  
105 period and change in phage titer and found that the strongest attenuation of phage  
106 replication, or the 'OFF' state, occurred with a Tet-regulated promoter and a very weak  
107 RBS, which resulted in a 2-fold increase in latent period and an approximately 2-fold  
108 decrease in a change in phage titer. Ligand induced activation to the 'ON' state restored  
109 activity of synthetic phages to levels comparable to unregulated T7\_WT phage. Our  
110 study provides a basic proof-of-concept for recoding a phage genome with synthetic  
111 regulation, paving the way of engineering more sophisticated circuitry to enable phages  
112 to carry out complex, user-defined tasks.

113

114 Results

115 **Refactored synthetic phages retain wildtype infectivity**

116 We sought to create a simple, dynamically controllable infectivity switch for  
117 phages using ligand-responsive transcriptional repressors naturally utilized for gene  
118 regulation in bacteria. To test our synthetic switch, we chose bacteriophage T7, a well  
119 characterized, prototypical obligate lytic phage that infects *Escherichia coli*. Bacterial  
120 systems are routinely engineered with inducible gene expression by placing ligand-  
121 responsive promoters upstream of gene of interest<sup>17</sup>. Bacterial genomes are generally  
122 tolerant to promoter substitutions as most substitutions have marginal effects on  
123 bacterial fitness<sup>18</sup>. In contrast, phage genomes have evolved to maintain compact  
124 genomes containing mostly essential genes with overlapping regulation<sup>19-21</sup>. This  
125 makes it challenging to identify a suitable T7 gene whose promoter can be replaced by  
126 ligand-responsive bacterial promoter.

127 The T7 phage genome is approximately 40 kb long and is roughly partitioned into  
128 early, middle and late-stage genes denoting their roles and when they are expressed at  
129 different stages of T7 lifecycle<sup>22</sup>. Transcription of phage genes occurs in two stages  
130 after infecting its host. First, the host *E. coli* RNA polymerase transcribes T7 RNA  
131 polymerase and other early phage genes<sup>23-26</sup>. After early genes have been expressed,  
132 the host RNA polymerase is inhibited and T7 RNA polymerase assumes responsibility  
133 for transcribing middle and late-stage genes<sup>27,28</sup>. T7 RNA polymerase is thus a “lynchpin”  
134 gene and we reasoned that a ligand-responsive promoter regulating this gene (*gp1*)  
135 would be an optimal site to exert systemic control. The region upstream of *gp1* gene is

136 comprised of several parts (Fig. 1A). The beginning of the genome contains elements  
137 used for replication, including terminal repeats, promoter A0 recognized by the host  
138 RNA polymerase, and origin of replication  $\phi$ OL<sup>29</sup>. Downstream of these components lies  
139 early promoters A1, A2 and A3, all of which are recognized by the host RNA  
140 polymerase, followed by early phage genes *gp0.3*, *gp0.4*, *gp0.5*, *gp0.6*, and *gp0.7*.  
141 These genes are involved in host suppression and inhibition of host defenses<sup>30</sup>.

142 We assembled engineered T7 phage genomes in yeast without the genomic  
143 segments covering early promoters A0, A1, A2, A3, origin of replication  $\phi$ OL, and gene  
144 products *gp0.3*, *gp0.4*, *gp0.5*, *gp0.6*, and *gp0.7*, thereby retaining the essential  
145 replication elements but simplifying the early genome to create an effective regulatory  
146 switch. This approximately 3 kb long genomic tract was replaced with 95-100 bp long  
147 ligand-responsive promoter NalC, PmeR, or TetR (T7\_NalC, T7\_PmeR, and T7\_TetR,  
148 respectively) placed immediately upstream of *gp1* (T7 RNA polymerase) (Fig. 1A).  
149 Engineered phages were subsequently ‘rebooted’ by transforming their genome into an  
150 *E. coli* host<sup>31</sup>. Once an engineered phage infects a host expressing the repressor, the  
151 repressor will bind to its cognate promoter and block the expression of *gp1*, attenuating  
152 phage activity (Fig. 1B). In the presence of the inducer or in a host where cognate  
153 repressor is absent, the repressor is unable to bind to the promoter, initiating  
154 transcription of *gp1* and reactivating the phage (Fig. 1B).

155 Since phage amplification occurs rapidly within the host, we wanted to evaluate  
156 different repressor-promoter systems for their OFF-states. We chose to test repressor-  
157 promoter systems NalC, PmeR, and TetR as these systems have been previously  
158 engineered with tight and inducible gene regulation<sup>32–34</sup>. However, before comparing the

159 ability of different repressor-promoters to regulate the phage, we first sought to  
160 determine if our engineered phages (T7\_NalC, T7\_PmeR and T7\_TetR) were viable  
161 after removing approximately 3 kb (~7%) of native genes and regulatory regions. The  
162 engineered phages were viable despite the substantial genomic disruption. Efficiency of  
163 plating (EOP) assays showed no significant difference ( $p$ -value > 0.05) in ability to  
164 plaque between our engineered phages and T7\_WT (Fig. 1C). Furthermore, the plaque  
165 morphology of the engineered phages was indistinguishable from T7\_WT in *E. coli* with  
166 and without *gp1* complementation (Fig. 1D). Taken together, our engineered phages  
167 were able to maintain viability and infectivity on susceptible bacterial host compared to  
168 T7\_WT.

169

### 170 **Repressing *gp1* diminishes activity of synthetic phages**

171 We applied T7\_NalC, T7\_PmeR, and T7\_TetR on *E. coli* host expressing the  
172 cognate repressor from a plasmid (Fig. 2A, *E. coli*\_NalC, *E. coli*\_PmeR and *E.*  
173 *coli*\_TetR, respectively) or control wildtype *E. coli* host without repressor (Fig. 2A, *E.*  
174 *coli*\_WT). For each engineered phage, we evaluated the estimated latent period (the  
175 time required to complete one infection cycle) by comparing cell densities at two  
176 different multiplicities of infection (MOI or the phage-to-bacteria ratio). The latent period  
177 can be estimated from the inflection in the growth curves between two MOIs where the  
178 difference is equal to the phage burst size (see Materials and Methods) (Fig. 2A). All  
179 three synthetic phages showed a delayed latent period in host expressing the cognate  
180 repressor compared to *E.coli*\_WT lacking the repressor (Fig. 2A and 2B). The TetR  
181 repressor had the strongest attenuation of phage activity among the three repressors



182 based on estimated lysis time (Fig. 2A). In *E.coli\_WT*, T7\_PmeR and T7\_TetR required  
183 approximately 20 minutes to lyse the host, which was comparable to that of T7\_WT (Fig.  
184 S1). This is also consistent with similar EOPs for wildtype and engineered phages (Fig.  
185 1B). T7\_NalC required a longer time of 30 minutes to lyse the host, indicating that the  
186 NalC promoter may be affecting phage fitness even in the absence of the repressor.  
187 When engineered phages were applied on hosts expressing their corresponding  
188 repressors, the estimated lysis time of hosts *E. coli\_PmeR*, *E. coli\_NalC* and  
189 *E.coli\_TetR* was approximately 40, 30 and 40 minutes, respectively. As expected, the  
190 repressor was able to delay the activity of engineered phages (Fig. 2B). We found that  
191 the TetR system gave the longest delay (2-fold) in estimated lysis time after normalizing  
192 for differences in basal activity of each engineered phage on *E.coli\_WT* (Fig. 2C). We  
193 also examined residual bacterial density (OD<sub>600</sub>) as it is indicative of the fraction of host  
194 cells that remain unlysed. After 6 hours of incubation with the engineered phages,  
195 bacterial density was highest for *E. coli\_TetR*, followed by *E.coli\_NalC* and then  
196 *E.coli\_PmeR* (Fig. 2A). Therefore, synthetic switches engineered into the phages able  
197 to reduce phage efficacy and delay host cell lysis. Since the TetR system gave the  
198 longest delay, we chose *E.coli\_TetR* and T7\_TetR for further optimization.

199

## 200 **Engineering ribosome binding sites further enhances phage control**

201 Although T7\_TetR performed better than T7\_PmeR and T7\_NalC, T7\_TetR still  
202 showed relatively high activity in the OFF-state (Fig. 2C). We hypothesized this could be  
203 due to high basal expression of *gp1* from the TetR-regulated promoter. To address this,  
204 we investigated if modifications to the ribosome binding site (RBS) could further

205 attenuate phage activity in the OFF-state by reducing basal expression of *gp1*. We  
206 engineered T7\_TetR with three RBS variants of the TetR-regulated promoter. The  
207 chosen RBS variants spanned a range of translational activities based on a large-scale  
208 experimental study of *E. coli* RBS variants<sup>32,35</sup>. Relative to the strength of the original  
209 RBS at 100% strength (T7\_TetR\_RBS1), we engineered T7\_TetR with RBS variants at  
210 39% strength (T7\_TetR\_RBS2), 3% strength (T7\_TetR\_RBS3), and 1% strength  
211 (T7\_TetR\_RBS4) (see Methods). On *E.coli\_WT* without repressor, all T7\_TetR RBS  
212 variants required an estimated 15-20 minutes to lyse the host, comparable to T7\_WT,  
213 indicating that strength of RBS had no measurable impact on phage activity in the  
214 absence of repression (Fig. 3A and 3B). In contrast, when the engineered phages were  
215 applied on *E. coli\_TetR*, there was substantial delay in time required to lyse the host  
216 compared to *E. coli\_WT* (Fig. 3B). The time required to lyse *E. coli\_TetR* was inversely  
217 related to the strength of the RBS. T7\_TetR\_RBS4 (the weakest RBS) required 95  
218 minutes to lyse *E. coli\_TetR*, the longest time and a 4.75-fold greater delay relative to *E.*  
219 *coli\_WT* (Fig. 3C). T7\_TetR\_RBS4 also retained a high residual bacterial density after 6  
220 hours, suggesting lowering basal expression of *gp1* successfully attenuated T7 activity  
221 (Fig. 3A). Weaker RBSs are thus able to provide enhance control of phage replication  
222 by further restricting phage activity in the OFF-state.

223

## 224 **Repression significantly delays replication in engineered phages**

225 To further characterize the effectiveness of our synthetic switch, we examined  
226 the number of progeny phages over one infection cycle using one-step growth curves  
227 for T7\_WT and T7\_TetR\_RBS4 on *E. coli\_WT* and *E.coli\_TetR* (Fig 4A). By counting

228 the number of phages produced at different times, we determined the actual latent  
229 period (the time required to complete one infection cycle), and compared the log change  
230 in phage titer over one infection cycle. In prior literature, the latent period for T7\_WT is  
231 approximately 20 minutes with an expected 2-2.5 log increase in the total phage  
232 population after one infection cycle<sup>36,37</sup>. Since the TetR promoter and RBS does not  
233 have an impact on T7 fitness, we expected similar values for T7\_TetR\_RBS4 on *E.*  
234 *coli*\_WT.

235 Our one step assay confirmed that both T7\_WT and T7\_TetR\_RBS4 have a 20  
236 minute latent period on *E.coli*\_WT and T7\_WT has a 20 minute latent period on  
237 *E.coli*\_TetR (Figure 4A). After one infection cycle, the average increase in total phages  
238 for T7\_WT on *E. coli*\_WT and *E. coli*\_TetR was approximately  $2.5\pm 0.3$  and  $2.1\pm 0.2$  log  
239 respectively, while T7\_TetR\_RBS4 saw a comparable increase in total phages of  
240  $2.7\pm 0.5$  log on *E. coli*\_WT. These results confirm that the TetR repression system had  
241 no apparent effect on phage activity for T7\_WT or for T7\_TetR\_RBS4 in the absence of  
242 repression. In contrast, T7\_TetR\_RBS4 infecting *E. coli*\_TetR had greatly extended  
243 latent period of 40 minutes with only a  $1.4\pm 0.4$  log increase in total phages (Fig. 4A),  
244 indicated a dramatic delay of phage activity with very gradual production of phage  
245 progeny during each replication cycle. We next determined how the TetR\_RBS4  
246 repression system affects the ability of the phage to plaque on *E. coli*\_TetR compared  
247 to *E. coli*\_WT using an EOP assay. T7\_TetR\_RBS4 phages had an EOP of  $-0.2\pm 0.1$   
248 while T7\_WT phage had an EOP of  $0.2\pm 0.1$ . The plaque activity of T7\_TetR\_RBS4 and  
249 T7\_WT was slightly significantly different ( $p$ -value = 0.05) and the T7\_TetR\_RBS4  
250 plaques were significantly smaller than T7\_WT plaques after nineteen hours of

251 incubation, indicative of much slower phage activity and consistent with our one-step  
252 results (Fig 4B). In summary, engineered T7\_TetR\_RBS4 phages have a significant  
253 delay in replication compared to wildtype when the synthetic repressor is present, and  
254 phage activity can be fully recovered if the synthetic repressor is not present or under  
255 induction.

256

### 257 **Phage infectivity can be further controlled by tuning inducer concentration**

258 To assess if phage activity could be dynamically controlled using a small  
259 molecule inducer, we compared the activities of T7\_TetR\_RBS4 with and without the  
260 inducer anhydrotetracycline (aTC)<sup>38</sup>. Comparison of spot plates showed that repressed  
261 T7\_TetR\_RBS4 (Fig. 5A, left) regained activity comparable to T7\_WT when maximally  
262 induced at 1  $\mu$ M aTC (Fig 4A, right, Fig. S2). A control experiment confirmed that aTC  
263 had no impact on activities of T7\_TetR\_RBS4 on *E. coli*\_WT host (Fig. S3). However,  
264 host cells grown over a gradient of aTC concentrations experienced a minor fitness  
265 deficit at higher aTC concentrations suggesting inducer toxicity may have partially  
266 contributed to cell death<sup>39</sup>. To evaluate if the activity of T7\_TetR\_RBS4 could be tuned  
267 by the inducer in a dose-dependent manner without cell toxicity, we performed a time  
268 course experiment over a range of aTC concentrations from 0 to 1  $\mu$ M (Fig. 5B).  
269 T7\_TetR\_RBS4 showed switch-like behavior from no activity to high activity with  
270 modest dose-dependent activity over a narrow range of aTC concentration from 15-23  
271 nM. Above 23 nM, T7\_TetR\_RBS4 was fully switched 'ON' and activity was comparable  
272 to activity at maximal induction at 1  $\mu$ M (Fig. 5B). Below 15 nM, the activity of  
273 T7\_TetR\_RBS4 was nearly the same as the activity with no inducer. The tunable

274 concentration range (15-23 nM) showed large variations which arise due to high  
275 stochasticity in the expression of *gp1* across the host population at these concentrations.  
276 Since T7 RNA polymerase can be recycled for phage gene expression<sup>40</sup>, even  
277 stochastic bursts of expression would eventually lead to bacterial lysis. Altogether these  
278 results show that a moderate aTC concentration can provide a tunable level of control  
279 over phage activity.

280

## 281 Discussion

282

283 In this study, we engineered synthetic gene regulation into T7 phage to create a  
284 phage-bacterial system with ligand-regulated infectivity. We deleted a large tract of the  
285 genome from T7 phage and inserted a suite of ligand-regulated promoters to control the  
286 expression of *gp1*, the T7 RNA polymerase. The deletion of phage early promoters and  
287 genes and replacement with ligand-regulated promoter resulted in a viable phage with  
288 infectivity comparable to T7\_WT. Our most optimized engineered phage,  
289 T7\_TetR\_RBS4, had a 2-fold delay in estimated latent period and an approximately 2-  
290 fold decrease in change in phage titer after one replication cycle compared to T7\_WT.  
291 The activity of the engineered phage could be fully recovered in dose-dependent  
292 manner by adding the inducer ligand.

293 Our engineered phage sets the stage for several improvements to further refine  
294 and control phage infectivity. Because the infectivity of our engineered phage was  
295 determined solely by control over T7 RNAP, even basal levels of expression would  
296 allow the phage to escape repression proceed with infection. Adding multiple levels of  
297 repression throughout the phage genome could substantially improve our system and

298 decrease the activity the phage in the OFF state<sup>41,42</sup>. Critical genes such as late  
299 structural genes would make natural targets for improving control over the phage  
300 replication. Our study and other previous reports suggest that the phage genome may  
301 be tolerant to such changes without affecting viability<sup>36,43</sup>.

302 An engineered phage with a dynamic controllable infectivity switch can be used  
303 as a potent tool for bacterial community control<sup>44,45</sup>. Utilizing different repression  
304 systems across different bacterial hosts, phages can be redirected to different bacteria  
305 in the same community<sup>46</sup>. Phages could also be continuously propagated in a  
306 community using a ‘feeder’ host whose susceptibility could be turned ON or OFF as  
307 needed. By tuning inducer concentrations<sup>47,48</sup>, phages could be engineered to repress  
308 but not eliminate specific bacterial hosts in a complex community. Alternatively, our  
309 engineered phages can act as pseudo-lysogenic phages, maintaining a low burden on  
310 the targeted microbe until being triggered to eliminate the host. This could be useful for  
311 applications like starter cultures, where timed bacterial lysis is a critical consideration for  
312 cheese maturation<sup>49</sup>. Our study presents a simple genetic regulatory technique that can  
313 be further engineered to create a more controllable phage-bacterial system to precisely  
314 manipulate microbial communities<sup>50–52</sup>.

315  
316  
317  
318  
319  
320  
321  
322  
323  
324  
325  
326  
327  
328  
329  
330  
331  
332  
333  
334

## Figure descriptions

### **Figure 1. Engineered phages retain wildtype infectivity**

**(A)** Schematic illustration of the T7 bacteriophage genome with early genes shown in an expanded closeup. The organization of the phage genome is shown in the middle, wildtype phage is shown top, and the engineered phage is shown bottom. The portion of the phage genome shown boxed in black is engineered with a replacement synthetic promoter and ribosome binding site (RBS). **(B)** On top (1), an illustration of the phage “OFF” state, where repressor (green) prevents RNA Polymerase (RNAP, blue) binding and blocks *gp1* transcription, stopping phages from killing host. On bottom (2), a schematic illustration of the phage “ON” state. Infection without the repressor present allows RNAP to transcribe *gp1* and phages replicate and kill the bacterial host. **(C)** Ability of engineered T7 phages to infect *E. coli* by Efficiency of Plating (EOP) using *E. coli* complementing *gp1* as a reference host. Compared to wildtype T7 (T7\_WT), T7 engineered with NalC, PmeR, and TetR (T7\_NalC, T7\_PmeR, and T7\_TetR, respectively) show no significant difference (n.s.) in ability to plaque. Data is represented as mean  $\pm$  SD of biological triplicates. **(D)** Plaque morphology for wildtype and engineered phages shown by plaque assay on wildtype *E. coli* and *E. coli* with *gp1* complemented host after a 19-hour incubation. Plaques for engineered phages retain wildtype plaque morphology.

### **Figure 2. Repression of *gp1* reduces activity in engineered phages**

**(A)** Bacterial cell density over time measured by absorbance (OD<sub>600</sub>) of wildtype host (*E. coli*\_WT; dotted lines) and host expressing NalC, PmeR or TetR repressor (*E. coli*\_NalC,

338 *E. coli\_PmeR*, *E. coli\_TetR*, respectively; solid lines) after addition of T7\_NalC (red),  
339 T7\_PmeR (green) or T7\_TetR (blue) repressors or T7\_WT (black). Phages were  
340 applied at time 0 at a MOI of  $10^{-3}$  and  $10^{-5}$ . Phages with synthetic promoters have  
341 delayed lysis on hosts expressing the cognate repressor but have a comparable  
342 estimated latent period in hosts without repressor. All data represented as mean  $OD_{600}$   
343  $\pm$  SD in technical triplicates. **(B)** The estimated latent period of engineered phages on  
344 wildtype host compared to host expressing the cognate repressor, as determined by  
345 comparing the inflection in the growth curves between two MOIs where the difference is  
346 equal to the phage burst size **(C)** The relative estimated latent period of engineered  
347 phage on hosts expressing the cognate repressor compared to wildtype host. See also  
348 Figure S1.

349

350 **Figure 3. Engineered ribosome binding sites further enhances control over phage**  
351 **activity**

352 **(A)** Bacterial cell density over time measured by absorbance ( $OD_{600}$ ) for wildtype (*E.*  
353 *coli\_WT*; dotted lines) and host expressing TetR repressor (*E. coli\_TetR*; solid lines)  
354 after application of engineered T7 with an RBS at 100% strength (T7\_TetR\_RBS1, dark  
355 blue), 39% strength (T7\_TetR\_RBS2, light blue), 3% strength (T7\_TetR\_RBS3, yellow)  
356 and 1% strength (T7\_TetR\_RBS4, orange). Phages were added at time 0 at a MOI of  
357  $10^{-3}$  and  $10^{-5}$ . The delay in estimated latent period increases as the RBS strength  
358 decreases. All data represented as mean  $OD_{600} \pm$  SD in biological triplicates. **(B)** The  
359 estimated latent period of engineered phages on *E. coli\_WT* compared to hosts  
360 expressing the TetR repressor. **(C)** The relative estimated latent period of engineered



361 phage on host expressing the TetR receptor compared to wildtype host. Single asterisk  
362 (\*) represents significant difference ( $p$ -value < 0.05). Non-significant difference not  
363 shown. See also Figure S2.

364

#### 365 **Figure 4. Repression significantly delays replication in engineered phages**

366 (A) One step growth assay showing phage titer (PFU/ml) of wildtype (T7\_WT) and  
367 engineered (T7\_TetR\_RBS4) phage on wildtype (*E. coli\_WT*) and engineered (*E.*  
368 *coli\_TetR*) host. Inset table shows the latent period (minutes) and an estimated log  
369 change in phage titer produced from the first replication cycle. All data shown as mean  
370  $\pm$  SD in biological triplicates. (B) Plaque assay of wildtype (T7\_WT) and T7 with TetR  
371 and a 1% strength ribosome binding site (T7\_TetR\_RBS4) phages on wildtype host (*E.*  
372 *coli\_WT*) and host expressing TetR repressor (*E. coli\_TetR*) host after 19 hours of  
373 incubation.

374

#### 375 **Figure 5. Phage infectivity can be tuned by changing inducer concentration**

376 (A) Spot plate assay measuring the ability of wildtype T7 (T7\_WT) and T7 with TetR  
377 and a 1% strength ribosome binding site (T7\_TetR\_RBS4) to infect *E. coli* expressing  
378 the TetR repressor without inducer (Repressed) or with 1  $\mu$ M anhydrotetracycline (aTC)  
379 inducer (Induced). Phages are spotted from  $10^{-3}$  to  $10^{-6}$  dilution and spots are imaged  
380 after 4 hours of incubation. Induction restores the phage ability to spot comparable to  
381 wildtype. (B) Bacterial cell density over time measured by absorbance ( $OD_{600}$ ) for *E.*  
382 *coli* expressing TetR repressor. T7\_TetR\_RBS4 phage is added at timepoint 0 at a MOI

383 of  $10^{-5}$ , and each culture contains aTC inducer ranging from a concentration of 0 to  
384 1000 nM (color gradient). See also Figure S3.

## 385 Supporting Information

386

### 387 **Figure S1. Expression of repressors has no effect on wildtype T7**

388 Bacterial cell density over time measured by absorbance ( $OD_{600}$ ) of wildtype T7 (T7\_WT)  
389 on wildtype host (*E. coli*\_WT; black) and host expressing NalC (*E. coli*\_NalC, red),  
390 PmeR (*E. coli*\_PmeR, green) or TetR (*E. coli*\_TetR, blue) repressor. Phages were  
391 applied at time 0 at a MOI of  $10^{-3}$  and  $10^{-5}$ . There is no delay of estimated latent period  
392 when any repressor is expressed compared to wildtype host. All data represented as  
393 mean  $OD_{600} \pm SD$  in technical triplicates.

394

### 395 **Figure S2. Activity of engineered phages is rescued by aTC inducer**

396 Bacterial cell density over time measured by absorbance ( $OD_{600}$ ) for *E. coli* expressing  
397 TetR repressor after application of no phages (T7\_None, grey), wildtype phage (T7\_WT,  
398 black), engineered T7 with an RBS at 100% strength (T7\_TetR\_RBS1, dark blue), 39%  
399 strength (T7\_TetR\_RBS2, light blue), 3% strength (T7\_TetR\_RBS3, yellow) and 1%  
400 strength (T7\_TetR\_RBS4, orange). Phages and 1  $\mu$ M aTC was added at timepoint.  
401 Addition of aTC rescues phage function and results in comparable time to lysis for  
402 engineered phages and T7\_WT. All data represented as mean  $OD_{600} \pm SD$  in biological  
403 triplicates.

404

### 405 **Figure S3. Inducer has no effect on bacterial growth or phage activity**

406 Bacterial cell density over time measured by absorbance (OD<sub>600</sub>) for **(A)** *E. coli*  
407 expressing TetR (*E. coli*\_TetR) without phage (T7\_None), **(B)** wildtype *E. coli* (*E.*  
408 *coli*\_WT) and engineered phage with a 1% strength RBS (T7\_TetR\_RBS4), and **(C)** *E.*  
409 *coli* expressing TetR (*E. coli*\_TetR) and wildtype phage (T7\_WT). Anhydrotetracycline  
410 (aTC) is added at concentrations from 0-1000 nM (color gradient) at time zero. *E. coli* is  
411 able to grow productively under all aTC concentrations and application of phages  
412 results in a reduction of cell density at the same time for all aTC concentrations. All data  
413 represented as mean OD<sub>600</sub> ± SD in biological triplicates.

414

415 **Table S1: Primers and Plasmids used in this study**

416 **Table S2: Promoter and Ribosome Binding Site sequences**

## 417 Materials and Methods

### 418 **Microbes and Culture Conditions**

419 *Escherichia coli* (*E. coli*) 10G, a highly competent derivative of DH10 $\beta$  was obtained  
420 from Lucigen (60107-1)<sup>53</sup>, T7 bacteriophage was obtained from ATCC (ATCC<sup>®</sup> BAA-  
421 1025-B2), and *Saccharomyces cerevisiae* BY4741<sup>54</sup> is a laboratory stock.

422

423 Bacterial cultures were grown in LB (Luria-Bertani) media (1% Tryptone, 0.5% Yeast  
424 Extract, 1% NaCl). For plating, LB agar contains 1.5% agar, while top agar contains  
425 0.5% agar (Teknova). Spectinomycin (115  $\mu$ g/ml final concentration, GoldBio<sup>®</sup>) was  
426 added to media for selections of pSC101\_NalC, pSC101\_PmeR and pSC101\_TetR. All  
427 incubations of bacterial and bacteriophage cultures were performed at 37°C, with the  
428 liquid culture shaking at 200-250 rpm consistently, otherwise specified.

429

430 T7 bacteriophage was grown and propagated using *E. coli* 10G in LB media. Phage  
431 stocks were tittered using plaque assay and stored in LB at 4°C.

432

433 *S. cerevisiae* BY4741 was grown in YPD (2% Peptone, 1% Yeast Extract, 2% Glucose)  
434 media prior to transformation. Yeast transformants were selectively grown on SD-Leu  
435 (0.17% Yeast Nitrogen Base, 0.5% Ammonium Sulfate, 0.162% Amino Acid-Leucine,  
436 [Sigma Y1376], 2% Glucose). YPD and SD-Leu plates contain 2.4% and 2% agar  
437 additionally, respectively. Yeast incubation was performed at 30°C, with liquid culture  
438 shaking at 200-250 rpm.

439

440 Short-term storage of liquid culture and plates were performed at 4°C and long-term  
441 storages of bacterial and yeast stock culture were performed at -80°C in screw-capped  
442 cryotubes, with 25% glycerol added as a cryoprotectant.

443

444 Bacterial and phage transformants were recovered in SOC (2% Tryptone, 0.5% Yeast  
445 Extract, 0.2% 5 M NaCl, 0.25% 1 M KCl, 1% 1 M MgCl<sub>2</sub>, 1% 1 M MgSO<sub>4</sub>, 2% Glucose)  
446 liquid media.

447

#### 448 **General Cloning Procedure**

449 PCR and cloning were adapted and performed using standard laboratory procedures<sup>12</sup>.  
450 Briefly, PCR amplification was performed using KAPA HiFi (Roche KK2101) for all  
451 amplifications with plasmid or phage templates. KAPA2G Robust PCR kits (Roche  
452 KK5005) were used to perform colony PCR and multiplex PCR for a screening of Yeast  
453 Artificial Chromosomes (YACs). All primer oligos were obtained from IDT™. Golden  
454 Gate assembly was performed using New England Biosciences (NEB) Golden Gate  
455 Assembly Kit (Bsal-HFv2, E1601L). DNA purification was performed using EZNA Cycle  
456 Pure Kits (Omega Bio-tek D6492-01) using centrifugation protocol. YAC extraction was  
457 performed using YeaStar Genomic DNA Extraction Kits (Zymo Research D2002).  
458 Gibson Assembly mixture was made in the laboratory (final concentration 100 mM Tris-  
459 HCL pH 7.5, 20 mM MgCl<sub>2</sub>, 0.2 mM dATP, 0.2 mM dCTP, 0.2 mM dGTP, 10 mM dTT,  
460 5% PEG-8000, 1 mM NAD<sup>+</sup>, 4 U/ml T5 exonuclease, 4 U/μl Taq DNA Ligase, 25 U/mL  
461 Phusion polymerase). PCR product visualization was performed using agarose gel

462 electrophoresis with appropriate agarose concentration and SYBR<sup>®</sup> Safe DNA Gel Stain  
463 (Invitrogen).

464

465 PCR amplification using plasmid templates was performed with 0.1 ng DNA template.  
466 Phage fragment amplification was performed using 1  $\mu$ l phage crude lysis treated at  
467 65°C for 10 minutes as a template. Deletions and insertions of the T7 genome were  
468 performed using PCR primers skipping or adding desired sequences, respectively. All  
469 plasmid-template PCR products were treated with DpnI (NEB) following standard  
470 protocol. Briefly, purified PCR product was combined with 5  $\mu$ l 10x CutSmart Buffer, 1  $\mu$ l  
471 DpnI, and dH<sub>2</sub>O to 50  $\mu$ l reaction. Digestion was performed at 37°C for at least 2 hours,  
472 followed by heat inactivation at 80°C, 20 minutes. PCR purification was performed  
473 afterward. All PCR products were quantified using NanoDrop 2000 Spectrophotometer  
474 (Thermo Scientific).

475

476 *E. coli* 10G competent cells were made by mixing 192 mL SOC with 8-ml overnight  
477 culture and incubating at 21°C and shaking at 200 rpm until OD<sub>600</sub>~0.4 was reached,  
478 determined by the Agilent Cary 60 UV-Vis Spectrometer using manufacturer  
479 documentation. Cells were centrifuged at 4°C, 800 xg to 1000 xg for 20 minutes, the  
480 supernatant was discarded, and cells were resuspended in 50 ml of pre-cooled 10%  
481 glycerol. Centrifugation and washing were repeated three times. Cells were  
482 resuspended in a final volume of ~1 ml 10% glycerol and were aliquoted and stored at -  
483 80°C. Cells made by this protocol are competent for both plasmid and YAC  
484 transformation using electroporation.

485

486 Electroporation was performed using 40  $\mu$ l 10G competent cell for both plasmids and  
487 YACs using a Biorad MicroPulser (165-2100), EC2 setting with 2-mm cuvette, 2.5 kV,  
488 single pulse. All cuvettes and Eppendorf tubes were chilled prior to the electroporation.  
489 After electroporation, recovery was performed by adding 950  $\mu$ l pre-warmed SOC and  
490 incubated at 37°C for 1 hour and plated on relevant selective media.

491

492 Detailed protocols for cloning are available on request. All primers and plasmids used in  
493 this study are listed in supporting document (Table S1).

494

### 495 **Phage Engineering**

496 A large segment (2961 bp) in the left end region of the wild type (WT) T7 phage  
497 genome, including promoters A0, A1, A2, A3 and *gp0.3-0.7* genes, was deleted. Two  
498 identical operator (repressor binding) sites were inserted, one upstream of -35 and the  
499 other in between the -35 and -10 consensus sequences replacing the spacer sequence  
500 of promoter A1 driving the expression of *gp1* gene. The three operator sites are NalC1,  
501 PmeR2, and TetO correspond to repressors, NalC, PmeR and TetR, respectively, in  
502 bacterial system. The Bujard RBS (Ec-TTL-R111) in TetO engineered phage was  
503 replaced by BBa\_J61106 (Ec-TTL-R065), BBa\_J61133 (Ec-TTL-R003), or DeadRBS  
504 (Ec-TTL-R001) with 39%, 3%, and 1% translational strength relative to the Bujard RBS  
505 as 100% strength<sup>35</sup>, respectively. The sequences of all consensus sequences, operator  
506 sites, RBS, and repressors used are included in supporting document (Table S2).

507

508 Engineered phage genomes were assembled using yeast assembly<sup>4,5</sup>, which requires  
509 yeast transformation of relevant DNA segments. A prs315 yeast centromere plasmid  
510 was split into three segments by PCR, separating the centromere and leucine selection  
511 marker, which has been shown to improve assembly efficiency by limiting  
512 recircularization events<sup>6</sup>. T7 genomic segments were made by PCR using WT T7 as a  
513 template.

514

515 Relevant DNA fragments were mixed (0.1 pmol/fragment) and transformed into *S.*  
516 *cerevisiae* BY4741 using the high efficiency yeast transformation protocol<sup>7</sup>. Successfully  
517 assembled YACs were selected using SD-Leu media. After 2-3 days of incubation at  
518 30°C, colonies were picked and directly assayed by multiplex colony PCR to screen for  
519 colonies with correctly assembled YACs. Multiplex PCR was an effective way of  
520 distinguishing correctly assembled YACs by interrogating junctions in the YACs.  
521 Correctly assembled YACs were purified and transformed into *E. coli* 10G cells, and  
522 after 1-hour recovery, 400 µl was inoculated in 4.6 ml LB. This culture was incubated  
523 until a complete lysis, engineered phages were purified, sequence-confirmed, and  
524 stored at 4°C in LB.

525

## 526 **Plasmid Descriptions**

527

528 pSC101\_NalC, pSC101\_PmeR and pSC101\_TetR contain a pSC101 backbone,  
529 spectinomycin resistance cassette, and repressors NalC, PmeR and TetR under  
530 constitutive promoter apFAB61, respectively.



531

532 pHT7\_gp1 contains a pBR backbone, kanamycin resistance cassette, mCherry  
533 fluorescence marker, and the T7 RNAP gene, *gp1*. Both mCherry marker and *gp1* are  
534 under constitutive expression.

535

### 536 **Bacterial Methods and Phage Titer Quantification**

537 Bacterial concentration was determined using a drop plate with 10-fold serial dilution of  
538 bacterial culture. Ten-microliters of bacterial dilution were dropped on LB plate in  
539 triplicate and counted after overnight incubation as colony-forming unit per milliliter  
540 (CFU/ml). Optical density (OD) measurement for all microplate-reader experiments  
541 were performed using microplate reader (Synergy HTX) at 600 nm wavelength, except  
542 the preparation of electrocompetent cell and the determination of log phase of bacterial  
543 culture that were performed using an Agilent Cary 60 UV-Vis Spectrometer.

544

545 Bacterial culture used for bacteria-phage interaction experiment and phage  
546 quantification was obtained at log phase when the initial phage was added, unless  
547 otherwise specified. Briefly, overnight bacterial culture was diluted 1:20 in liquid LB  
548 media. Bacterial culture was collected when the OD<sub>600</sub> reaches 0.4-0.6 as determined  
549 using an Agilent Cary 60 UV-Vis Spectrometer.

550

551 Phage stock was produced by a complete infection of phage in *E. coli* 10G. Bacterial  
552 lysate was centrifuged at 4,400 xg for 5 minutes and supernatant was filtered through a  
553 0.22 µm filter (Celltreat 151205-051). Phage titer was determined by plaque assay with

554 a 10-fold serial dilution of phage lysate. Typically, 10-20  $\mu$ l of phage dilution is mixed  
555 thoroughly with 250  $\mu$ l log-phase bacterial culture and 3.5-ml 0.5% top agar and plated  
556 on 37°C pre-warmed LB plate. Plaque number was counted after overnight incubation  
557 as plaque-forming unit per milliliter (PFU/ml). Spot assay was considered as a  
558 preliminary quantification of phage titer, which was performed occasionally prior to  
559 whole-plate plaque assay. Log-phase bacterial culture was mixed with 3.5-ml top agar  
560 and plated on pre-warmed LB plate. One-and-a-half microliters of phage dilution from  
561  $10^0$  to  $10^{-8}$  were spotted in triplicate on set top agar. The number of PFU was  
562 approximated determined at 4-6 hours of incubation and the appropriate dilution was  
563 chosen to perform whole-plate plaque assay.

564

565 Multiplicity of Infection (MOI) was determined by dividing phage titer by bacterial  
566 concentration. MOI used in this study was approximately  $10^{-3}$  and  $10^{-5}$ , except for one-  
567 step growth curve which was performed with MOI ~ 0.1.

568

569 Efficiency of Plating (EOP) was calculated using wildtype *E. coli* 10G as a reference  
570 host. After performing a plaque assay using desired bacterial hosts and phages, EOP  
571 was determined by dividing the experimental phage titer to the phage titer on the  
572 reference bacterial host. Typically, a 10-fold serial dilution was performed with phage  
573 stock in triplicate and 10  $\mu$ l appropriate phage dilutions were applied for plaque assay  
574 as described in desired bacterial host.

575

576 **Infection time course curves**

577 Preliminary change in phage activity of engineered phages was determined by  
578 evaluating bacterial growth after addition of different phages. Seven microliters of  
579 overnight bacterial culture were inoculated in 133  $\mu$ l of relevant media as a 1:20 dilution  
580 with corresponding antibiotics if necessary or 1  $\mu$ M aTC to the total volume of 140  $\mu$ l in  
581 a 96-well plate. Ten microliters of phages were added in triplicate at an MOI of  $10^{-3}$  and  
582  $10^{-5}$ . The culture was continuously incubated in microplate reader (Synergy HTX) at  
583 37°C with OD<sub>600</sub> measured every 10 minutes for 6 hours. The bacterial growth curve  
584 was constructed by averaging OD<sub>600</sub>.

585

#### 586 **Phage latent period estimation with infection time courses**

587 With the assumption that T7 phage produces an average of 100 progeny phage at 37°C  
588 when infecting  $10G^{37}$ , time to lysis was estimated by comparing the inflection point of  
589 bacterial growth (or the point at which the culture begins to lyse) for two cultures after  
590 addition of two phage titers spanning 2 orders of magnitude. An MOI of  $10^{-3}$  and  $10^{-5}$   
591 were chosen for this estimation. The estimated latent period was calculated as the  
592 difference between the last time point immediately before the inflection point in OD<sub>600</sub>  
593 between the two cultures.

594

#### 595 **Phage Growth Quantification: Latent Period and Phage Titer change estimation**

596 One-step phage growth assays were performed to construct one-step growth curves  
597 using an adaptation of a standard protocol<sup>55,56</sup>. Briefly, Seven-hundred-fifty microliters of  
598 an overnight bacterial were added into 15-ml LB media with antibiotics if necessary. The  
599 culture was incubated shaking at 250 rpm, 37°C in a 50-ml flask. Bacterial culture was

600 collected when the  $OD_{600} \sim 0.25$  was reached in 15-ml tube and concentrated into 1.5  
601 ml by centrifugation at 4,400 xg for 5 minutes. Bacterial culture was transferred into a 2-  
602 ml Eppendorf tube, phage was added into the culture at MOI  $\sim 0.1$ . Phage-bacteria  
603 culture was incubated for absorption without shaking at 37°C for 5 minutes. Culture was  
604 washed four times by centrifugation at 10,000 xg for 30 seconds, discarding the  
605 supernatant, and resuspending with 1-ml LB media, with antibiotic if necessary. In  
606 between washes, culture was resuspended by vortexing. After the final wash, 1-ml  
607 media was added and transferred into 14-ml pre-warmed media in a 50-ml flask. Eight-  
608 hundred microliters of culture was collected immediately and centrifuged at 10,000 xg  
609 for 30 seconds. Seven-hundred-microliter supernatant was filtered through 0.22  $\mu\text{m}$   
610 (Celltreat 151205-051) into a new Eppendorf tube. Fifteen-milliliter culture was  
611 incubated shaking at 250 rpm at 37°C. The culture sample was collected every 5 or 10  
612 minutes, depending on the type of phage culture for 60 or 120 minutes. Phage titer was  
613 quantified by plaque assay using wildtype *E. coli* 10G. Plated culture was incubated at  
614 37°C for 12 hours and the numbers of plaques were counted and calculated. The  
615 dilution of the phage lysate was made if necessary. The growth curve of each bacteria-  
616 phage combination was constructed in biological triplicates.

617

618 The latent period of each phage-bacteria combination was quantified by the first phage  
619 replication cycle<sup>56</sup> using one-step phage growth curve. The mid-timepoint at  
620 exponential-phase of replication cycle in between plateau phage titer was considered as  
621 a latent period.

622

623 The change in total phage titer was estimated using the phage growth curve by  
624 calculating the log difference of number of phage progenies at the plateau after the first  
625 replication cycle and at the initial plateau where phage titer added into the experimental  
626 culture.

627

### 628 **Inducer dependency assay**

629 The activity of phage in response to a range of aTC inducer concentrations was  
630 determined by quantifying bacterial growth using OD<sub>600</sub>. Briefly, 7 µl overnight bacterial  
631 culture was inoculated in 133 µl of relevant medium as 1:20 dilution to the total volume  
632 of 140 µl in a 96-well plate. Media used was prepared with a range of aTC concentration  
633 from 0 to 1 µM. Culture was incubated in a microplate reader (Synergy HTX), and OD  
634 was measured at 600 nm wavelength. When bacterial OD<sub>600</sub> ~ 0.25 was reached, 10 µl  
635 of desired phage or LB as control was added into the culture for MOI ~ 10<sup>-5</sup>. Culture was  
636 continuously incubated for 7 hours using vertical shaking mode, and OD<sub>600</sub> was  
637 measured every 10 minutes. The experiment was performed in biological triplicates.

638

### 639 **Statistical Analysis**

640 All data analyses were performed in Microsoft Excel 2020 and R v4.0.4<sup>57</sup>. Bonferroni  
641 pairwise *t*-test<sup>58,59</sup> was used to detect the difference amongst conditions in all  
642 experiments. Statistical analyses were considered significant at  $p < 0.05$ .

### 643 **Author Information**

644

### 645 **Corresponding Author**

646

647 **Srivatsan Raman** – *Department of Biochemistry, University of Wisconsin – Madison,*  
648 *433 Babcock Dr, Madison, Wisconsin 53706, United States; Email: sraman4@wisc.edu*

649

#### 650 **Authors**

651

652 **Chutikarn Chitboonthavisuk** – *Department of Biochemistry, University of Wisconsin –*  
653 *Madison, 433 Babcock Dr, Madison, Wisconsin 53706, United States*

654

655 **Chun Huai Luo** – *Department of Biochemistry, University of Wisconsin – Madison, 433*  
656 *Babcock Dr, Madison, Wisconsin 53706, United States*

657

658 **Phil Huss** – *Department of Biochemistry, University of Wisconsin – Madison, 433*  
659 *Babcock Dr, Madison, Wisconsin 53706, United States*

660

661 **Mikayla Fernholz** – *Department of Biochemistry, University of Wisconsin – Madison,*  
662 *433 Babcock Dr, Madison, Wisconsin 53706, United States*

663

#### 664 **Author Contributions**

665 C.C. and C.H.L. contributed equally. S.R., C.C., C.H.L., P.H., and M.F. conceptualized  
666 and designed the study. C.H.L. and M.F. constructed plasmids. C.C. and C.H.L.  
667 performed the experiment, curated the data, performed the analysis, wrote the original  
668 manuscript, and designed the figures. S.R., C.C., C.L., P.H., and M.F. reviewed and  
669 edited the manuscript. All authors discussed the results and provided critical feedback  
670 on the manuscript.

671

#### 672 **Notes**

673

674 S.R. is on the scientific advisory board of MAP/PATH LLC. All other authors declare no

675 competing financial interest.

## 676 Acknowledgements

677 This work was supported by National Institute for Allergy and Infectious Disease grant  
678 1R21AI156785-01 (to S.R). C.C was supported by a graduate training scholarship from  
679 the Anandamahidol Foundation (Thailand).

680

## 681 References

682

- 683 (1) Azam, A. H., and Tanji, Y. Bacteriophage-host arm race: an update on the  
684 mechanism of phage resistance in bacteria and revenge of the phage with the  
685 perspective for phage therapy.
- 686 (2) Yang, H. H., Ma, Y., Wang, Y., Yang, H. H., Shen, W., and Chen, X. (2014, July 23)  
687 Transcription regulation mechanisms of bacteriophages: Recent advances and future  
688 prospects. *Bioeng. Bugs*. Landes Bioscience.
- 689 (3) Prell, H. H. (1975) Regulation of gene expression in Salmonella phage P22 - II.  
690 Regulation of expression of late functions. *MGG Mol. Gen. Genet.* 136, 351–360.
- 691 (4) Bushman, F. D., and Ptashne, M. (1986) Activation of transcription by the  
692 bacteriophage 434 repressor (in vitro transcription/RNA polymerase/ethylation  
693 interference/protein-protein interaction). *Proc. Natl. Acad. Sci. USA*.
- 694 (5) Kuhstoss, S., and Rao, R. N. (1991) Analysis of the integration function of the  
695 streptomycete bacteriophage  $\phi$ C31. *J. Mol. Biol.* 222, 897–908.
- 696 (6) Court, D. L., Oppenheim, A. B., and Adhya, S. L. (2007, January 15) A new look at  
697 bacteriophage  $\lambda$  genetic networks. *J. Bacteriol.* American Society for Microbiology  
698 Journals.
- 699 (7) Rojo, F. (1999) Repression of Transcription Initiation in Bacteria. *J. Bacteriol.* 181,  
700 2987.
- 701 (8) Guzmán-Trampe, S., Ceapa, C. D., Manzo-Ruiz, M., and Sánchez, S. (2017, June  
702 15) Synthetic biology era: Improving antibiotic's world. *Biochem. Pharmacol.* Elsevier  
703 Inc.
- 704 (9) Lemire, S., Yehl, K. M., and Lu, T. K. Phage-Based Applications in Synthetic Biology  
705 5, 453–476.
- 706 (10) Brown, R., Lengeling, A., and Wang, B. (2017) Phage engineering: how advances  
707 in molecular biology and synthetic biology are being utilized to enhance the therapeutic  
708 potential of bacteriophages. *Quant. Biol.* 5, 42–54.
- 709 (11) Huss, P., and Raman, S. (2020) Engineered bacteriophages as programmable  
710 biocontrol agents. *Curr. Opin. Biotechnol.*, pp 116–121. Elsevier Ltd.
- 711 (12) Huss, P., Meger, A., Leander, M., Nishikawa, K., and Raman, S. (2021) Mapping  
712 the functional landscape of the receptor binding domain of t7 bacteriophage by deep  
713 mutational scanning. *Elife* 10.
- 714 (13) Kilcher, S., and Loessner, M. J. (2019) Engineering Bacteriophages as Versatile  
715 Biologics. *Trends Microbiol.* 27, 355–367.

- 716 (14) Pires, D. P., Cleto, S., Sillankorva, S., Azeredo, J., and Lu, T. K. (2016) Genetically  
717 Engineered Phages: a Review of Advances over the Last Decade. *Microbiol. Mol. Biol.*  
718 *Rev.* **80**, 523–543.
- 719 (15) Kulczyk, A. W., and Richardson, C. C. (2016) The Replication System of  
720 Bacteriophage T7, in *Enzymes*, pp 89–136. Academic Press.
- 721 (16) Casjens, S. R., and Hendrix, R. W. (2015, May 1) Bacteriophage lambda: Early  
722 pioneer and still relevant. *Virology*. Academic Press Inc.
- 723 (17) Chen, Y., Ho, J. M. L., Shis, D. L., Gupta, C., Long, J., Wagner, D. S., Ott, W.,  
724 Josić, K., and Bennett, M. R. (2018) Tuning the dynamic range of bacterial promoters  
725 regulated by ligand-inducible transcription factors. *Nat. Commun.* **2017** *9*, 1–8.
- 726 (18) Gruber, T. M., and Gross, C. A. (2003) Multiple Sigma Subunits And The  
727 Partitioning Of Bacterial Transcription Space. *Annu. Rev. Microbiol* **57**, 441–66.
- 728 (19) Pacht, C. A., and Young, E. T. (1976) Detection of polycistronic and overlapping  
729 bacteriophage T7 late transcripts by in vitro translation. *Proc. Natl. Acad. Sci. U. S. A.*  
730 **73**, 312.
- 731 (20) Teif, V. B. (2010) Predicting Gene-Regulation Functions: Lessons from Temperate  
732 Bacteriophages. *Biophys. J.* **98**, 1247.
- 733 (21) Jack, B. R., Boutz, D. R., Paff, M. L., Smith, B. L., and Wilke, C. O. (2019)  
734 Transcript degradation and codon usage regulate gene expression in a lytic phage.  
735 *Virus Evol.* **5**.
- 736 (22) Dunn, J. J., and Studier, F. W. Complete Nucleotide Sequence of Bacteriophage  
737 T7 DNA and the Locations of T7 Genetic Elements.
- 738 (23) Kemp, P., Gupta, M., and Molineux, I. J. (2004) Bacteriophage T7 DNA ejection  
739 into cells is initiated by an enzyme-like mechanism. *Mol. Microbiol.* **53**, 1251–1265.
- 740 (24) P, K., LR, G., and IJ, M. (2005) Changes in bacteriophage T7 virion structure at the  
741 initiation of infection. *Virology* **340**, 307–317.
- 742 (25) García, L. R., and Molineux, I. J. (1995) Rate of translocation of bacteriophage T7  
743 DNA across the membranes of *Escherichia coli*. *J. Bacteriol.* **177**, 4066.
- 744 (26) Savalia, D., Robins, W., Nechaev, S., Molineux, I., and Severinov, K. (2010) The  
745 Role of the T7 Gp2 Inhibitor of Host RNA Polymerase in Phage Development. *J. Mol.*  
746 *Biol.* **402**, 118–126.
- 747 (27) McAllister, W. T., and Wu, H. L. (1978) Regulation of transcription of the late genes  
748 of bacteriophage T7. *Proc. Natl. Acad. Sci. U. S. A.* **75**, 804.
- 749 (28) FW, S., and JJ, D. (1983) Organization and expression of bacteriophage T7 DNA.  
750 *Cold Spring Harb. Symp. Quant. Biol.* **47 Pt 2**, 999–1007.
- 751 (29) J., K. T., and A., T. C. An Intermediate in the Replication of Bacteriophage T7 DNA  
752 Molecules.
- 753 (30) McAllister, W. T., and Barrett, C. L. (1977) Roles of the Early Genes of  
754 Bacteriophage T7 in Shutoff of Host Macromolecular Synthesis. *J. Virol.* **23**, 543.
- 755 (31) Ando, H., Lemire, S., Pires, D. P., and Lu, T. K. (2015) Engineering Modular Viral  
756 Scaffolds for Targeted Bacterial Population Editing. *Cell Syst.* **1**, 187.
- 757 (32) Liu, X., Gupta, S. T. P. P., Bhimsaria, D., Reed, J. L., Jos´, J., Rodríguez-Martínez,  
758 J. A., Ansari, A. Z., Raman, S., Jos´, J., Rodríguez-Martínez, J. A., Ansari, A. Z., and  
759 Raman, S. (2019) De novo design of programmable inducible promoters **47**, 10452–  
760 10463.
- 761 (33) Ramos, J. L., Martínez-Bueno, M., Molina-Henares, A. J., Terán, W., Watanabe, K.,



- 762 Zhang, X., Gallegos, M. T., Brennan, R., and Tobes, R. (2005) The TetR Family of  
763 Transcriptional Repressors. *Microbiol. Mol. Biol. Rev.* 69, 326–356.
- 764 (34) Lutz, R., and Bujard, H. (1997) Independent and tight regulation of transcriptional  
765 units in *Escherichia coli* via the LacR/O, the TetR/O and AraC/I 1-I 2 regulatory  
766 elements. Oxford University Press.
- 767 (35) Kosuri, S., Goodman, D. B., Cambray, G., Mutalik, V. K., Gao, Y., Arkin, A. P.,  
768 Endy, D., and Church, G. M. (2013) Composability of regulatory sequences controlling  
769 transcription and translation in *Escherichia coli*. *Proc. Natl. Acad. Sci. U. S. A.* 110,  
770 14024–14029.
- 771 (36) Nguyen, H. M., and Kang, C. Lysis Delay and Burst Shrinkage of Coliphage T7 by  
772 Deletion of Terminator T<sub>φ</sub> Reversed by Deletion of Early Genes 88, 2107–2115.
- 773 (37) You, L., Suthers, P. F., and Yin, J. (2002) Effects of *Escherichia coli* Physiology on  
774 Growth of Phage T7 In Vivo and In Silico. *J. Bacteriol.* 184, 1888–1894.
- 775 (38) Gossen, M., and Bujard, H. (1993) Anhydrotetracycline, a novel effector for  
776 tetracycline controlled gene expression systems in eukaryotic cells. *Nucleic Acids Res.*
- 777 (39) Halling-Sørensen, B., Sengeløv, G., and Tjørnelund, J. (2002) Toxicity of  
778 Tetracyclines and Tetracycline Degradation Products to Environmentally Relevant  
779 Bacteria, Including Selected Tetracycline-Resistant Bacteria.
- 780 (40) R, F., C, R., and G, D. (2004) Transcription reinitiation properties of bacteriophage  
781 T7 RNA polymerase. *Biochem. Biophys. Res. Commun.* 315, 376–380.
- 782 (41) Ponta, H., Rahmsdorf, H. J., Pai, S. H., Hirsch-Kauffmann, M., Herrlich, P., and  
783 Schweiger, M. (1974) Control of gene expression in bacteriophage T7: Transcriptional  
784 controls. *MGG Mol. Gen. Genet.* 134, 281–287.
- 785 (42) Endy, D., Kong, D., and Yin, J. (1997) Intracellular Kinetics of a Growing Virus: A  
786 Genetically Structured Simulation for Bacteriophage T7. *Biotechnol Bioeng.* John Wiley  
787 & Sons, Inc.
- 788 (43) Chan, L. Y., Kosuri, S., and Endy, D. (2005) Refactoring bacteriophage T7. *Mol.*  
789 *Syst. Biol.* 1, 2005.0018.
- 790 (44) Hu, Y. O. O., Hugerth, L. W., Bengtsson, C., Alisjahbana, A., Seifert, M., Kamal, A.,  
791 Sjöling, Å., Midtvedt, T., Norin, E., Du, J., and Engstrand, L. Bacteriophages Synergize  
792 with the Gut Microbial Community To Combat *Salmonella* 3, e00119--18.
- 793 (45) Ganeshan, S. D., and Hosseinidoust, Z. antibiotics Phage Therapy with a Focus on  
794 the Human Microbiota.
- 795 (46) Hennig, S., Rödel, G., and Ostermann, K. (2015) Artificial cell-cell communication  
796 as an emerging tool in synthetic biology applications. *J. Biol. Eng.* 2015 91 9, 1–12.
- 797 (47) Bertram, R., and Hillen, W. (2007) The application of Tet repressor in prokaryotic  
798 gene regulation and expression. *Microb. Biotechnol.*
- 799 (48) Schmitter, S., Fieseler, L., Klumpp, J., Bertram, R., and Loessner, M. J. (2017)  
800 TetR-dependent gene regulation in intracellular *Listeria monocytogenes* demonstrates  
801 the spatiotemporal surface distribution of ActA. *Mol. Microbiol.* 105, 413–425.
- 802 (49) Lortal, S., and Chapot-Chartier, M. P. (2005) Role, mechanisms and control of  
803 lactic acid bacteria lysis in cheese, in *International Dairy Journal*, pp 857–871. Elsevier.
- 804 (50) Vrancken, G., Gregory, A. C., Huys, G. R. B., Faust, K., and Raes, J. (2019,  
805 December 1) Synthetic ecology of the human gut microbiota. *Nat. Rev. Microbiol.*  
806 Nature Publishing Group.
- 807 (51) Mabwi, H. A., Kim, E., Song, D. G., Yoon, H. S., Pan, C. H., Komba, E. V. G., Ko,

808 G. P., and Cha, K. H. (2021, January 1) Synthetic gut microbiome: Advances and  
809 challenges. *Comput. Struct. Biotechnol. J.* Elsevier B.V.  
810 (52) de Souza, R. S. C., Armanhi, J. S. L., and Arruda, P. (2020) From Microbiome to  
811 Traits: Designing Synthetic Microbial Communities for Improved Crop Resiliency. *Front.*  
812 *Plant Sci.* 11, 1179.  
813 (53) Durfee, T., Nelson, R., Baldwin, S., Plunkett, G., Burland, V., Mau, B., Petrosino, J.  
814 F., Qin, X., Muzny, D. M., Ayele, M., Gibbs, R. A., Csörgo, B., Pósfai, G., Weinstock, G.  
815 M., and Blattner, F. R. (2008) The complete genome sequence of *Escherichia coli*  
816 DH10B: Insights into the biology of a laboratory workhorse. *J. Bacteriol.* 190, 2597–  
817 2606.  
818 (54) Baker Brachmann, C., Davies, A., Cost, G. J., Caputo, E., Li, J., Hieter, P., and  
819 Boeke, J. D. (1998) Designer Deletion Strains derived from *Saccharomyces cerevisiae*  
820 S288C: a Useful set of Strains and Plasmids for PCR-mediated Gene Disruption and  
821 Other Applications. *Yeast.*  
822 (55) Yu, Y.-P., Gong, T., Jost, unter, Liu, W.-H., Ye, D.-Z., and Luo, Z.-H. Isolation and  
823 characterization of five lytic bacteriophages infecting a *Vibrio* strain closely related to  
824 *Vibrio owensii*.  
825 (56) Chaudhry, W. N., Haq, I. U., Andleeb, S., and Qadri, I. (2014) Characterization of a  
826 virulent bacteriophage LK1 specific for *Citrobacter freundii* isolated from sewage water.  
827 *J. Basic Microbiol.* 54, 531–541.  
828 (57) (2021), R. C. T. R: A language and environment for statistical computing. *R Found.*  
829 *Stat. Comput. Vienna, Austria.*  
830 (58) Goeman, J. J., and Solari, A. (2014) Multiple hypothesis testing in genomics. *Stat.*  
831 *Med.* 33, 1946–1978.  
832 (59) Bland, j. M., and Altman, D. G. (1995) Multiple significance tests: The Bonferroni  
833 method. *BMJ* 310, 170.  
834

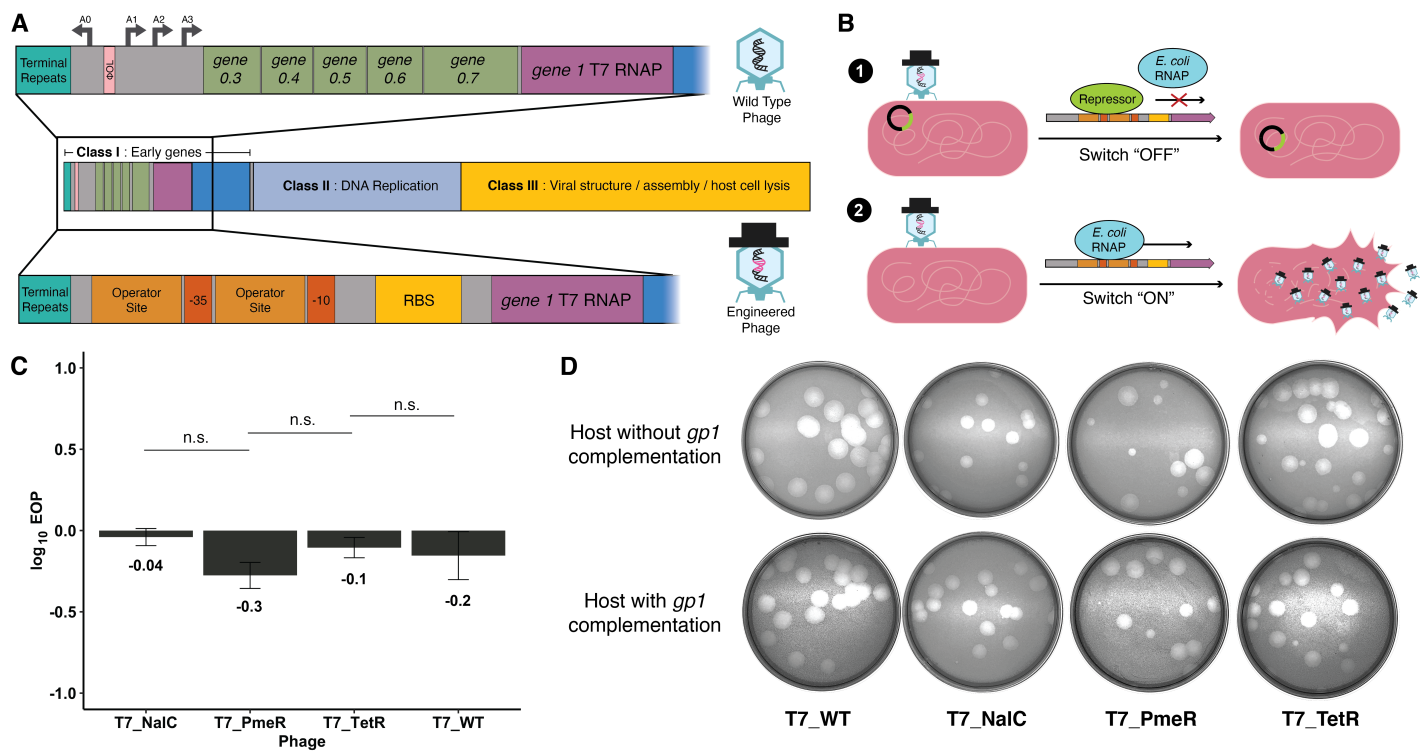

**Figure 1. Engineered phages retain wildtype infectivity**

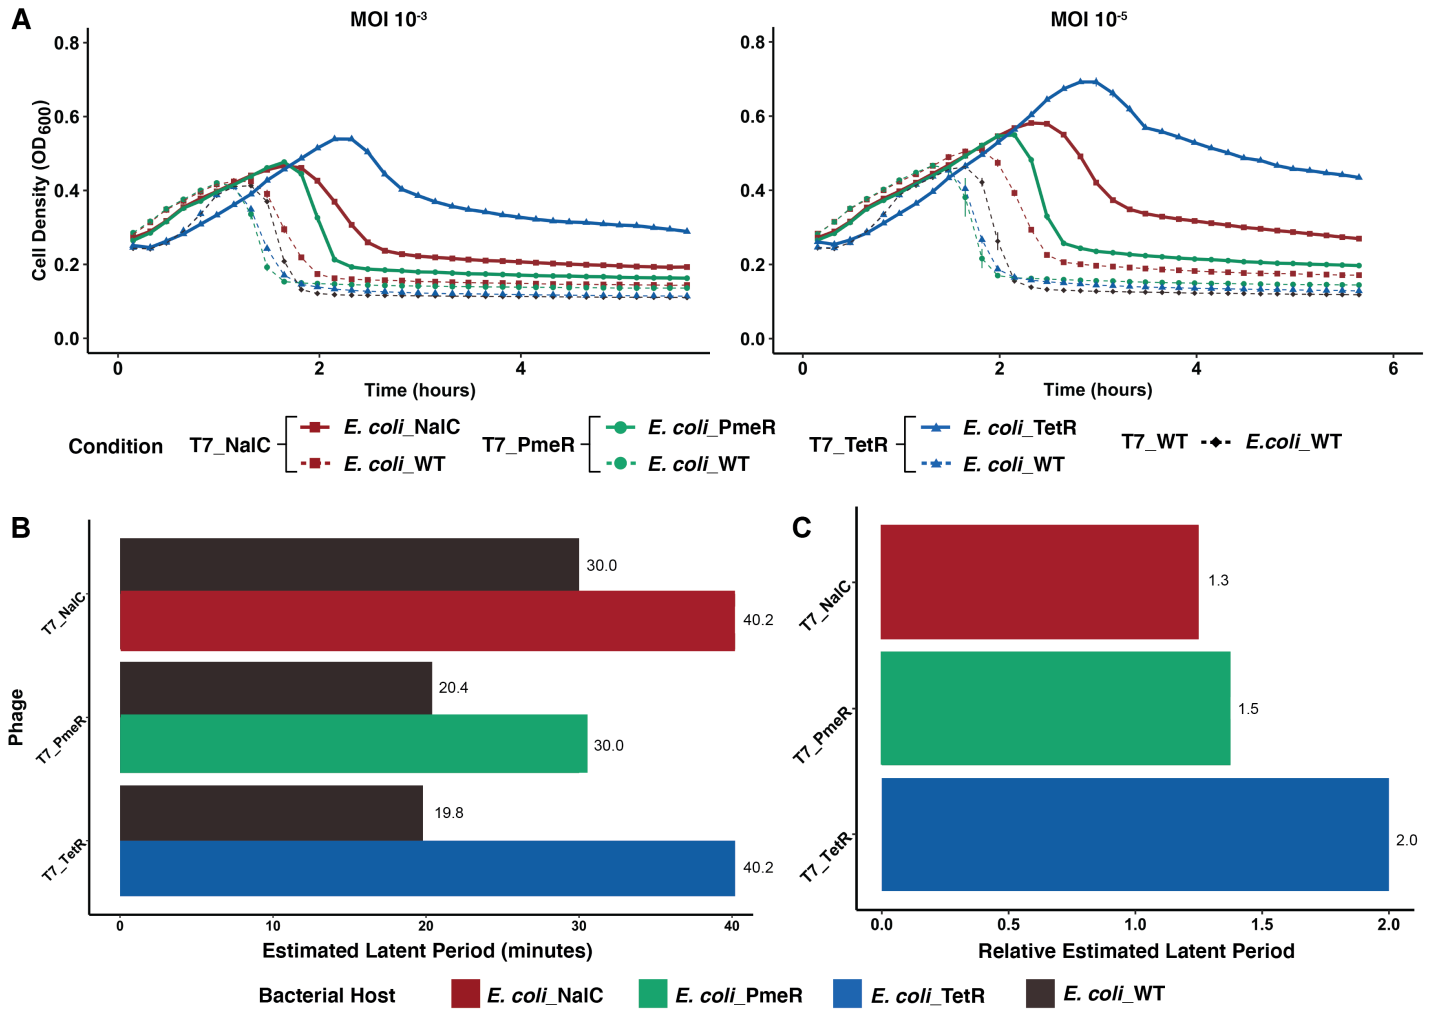

Figure 2. Repression of gp1 reduces activity in engineered phages

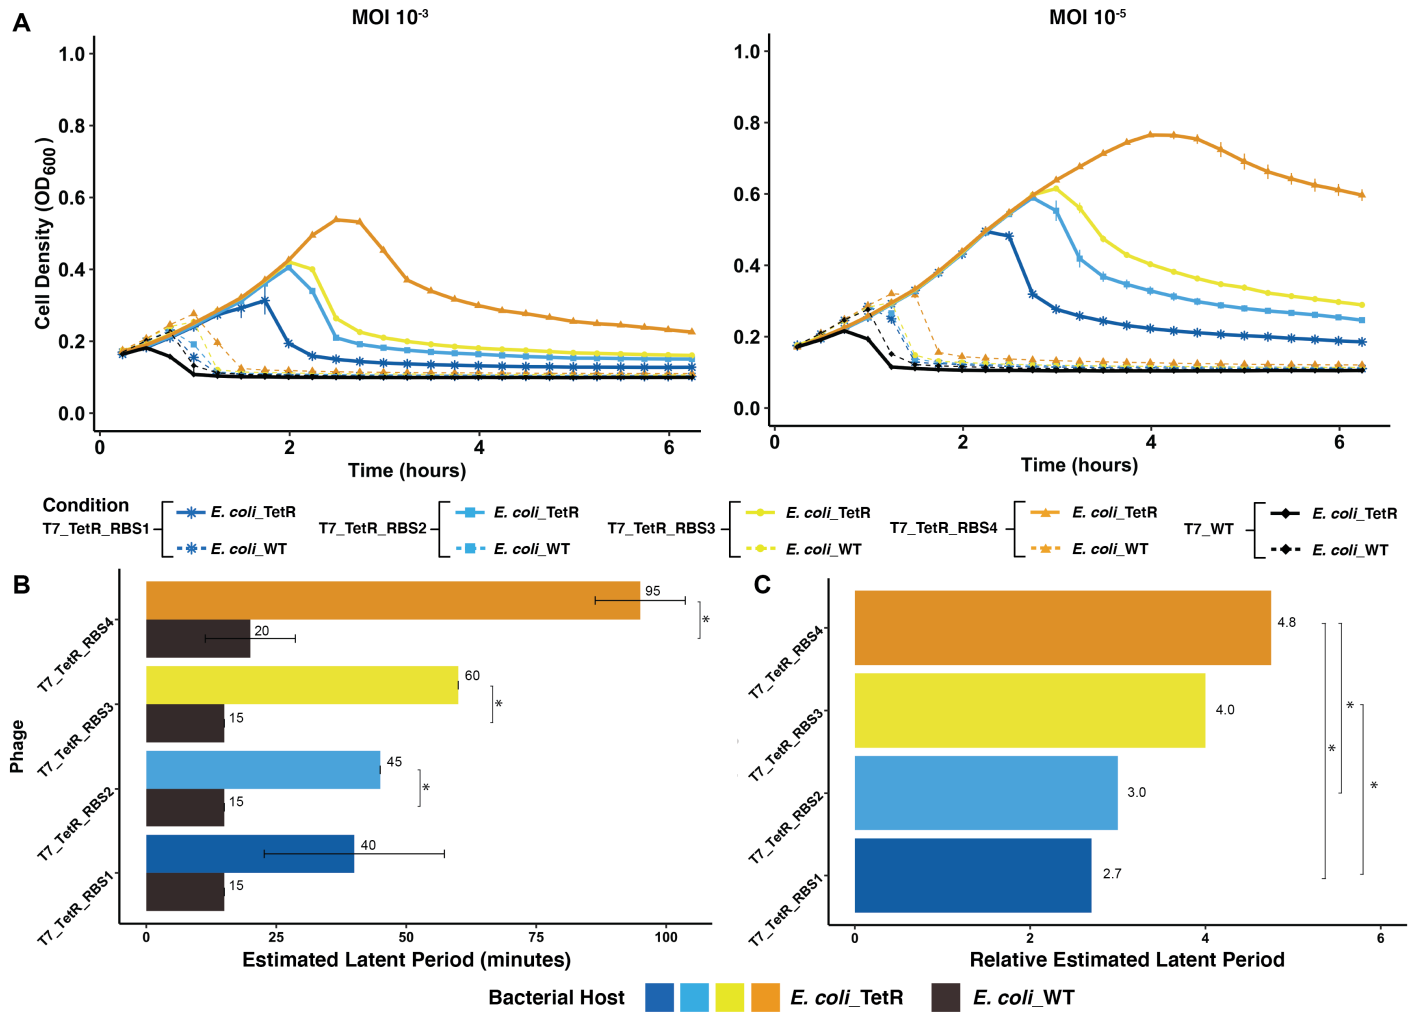

Figure 3. Engineered ribosome binding sites further enhances control over phage activity

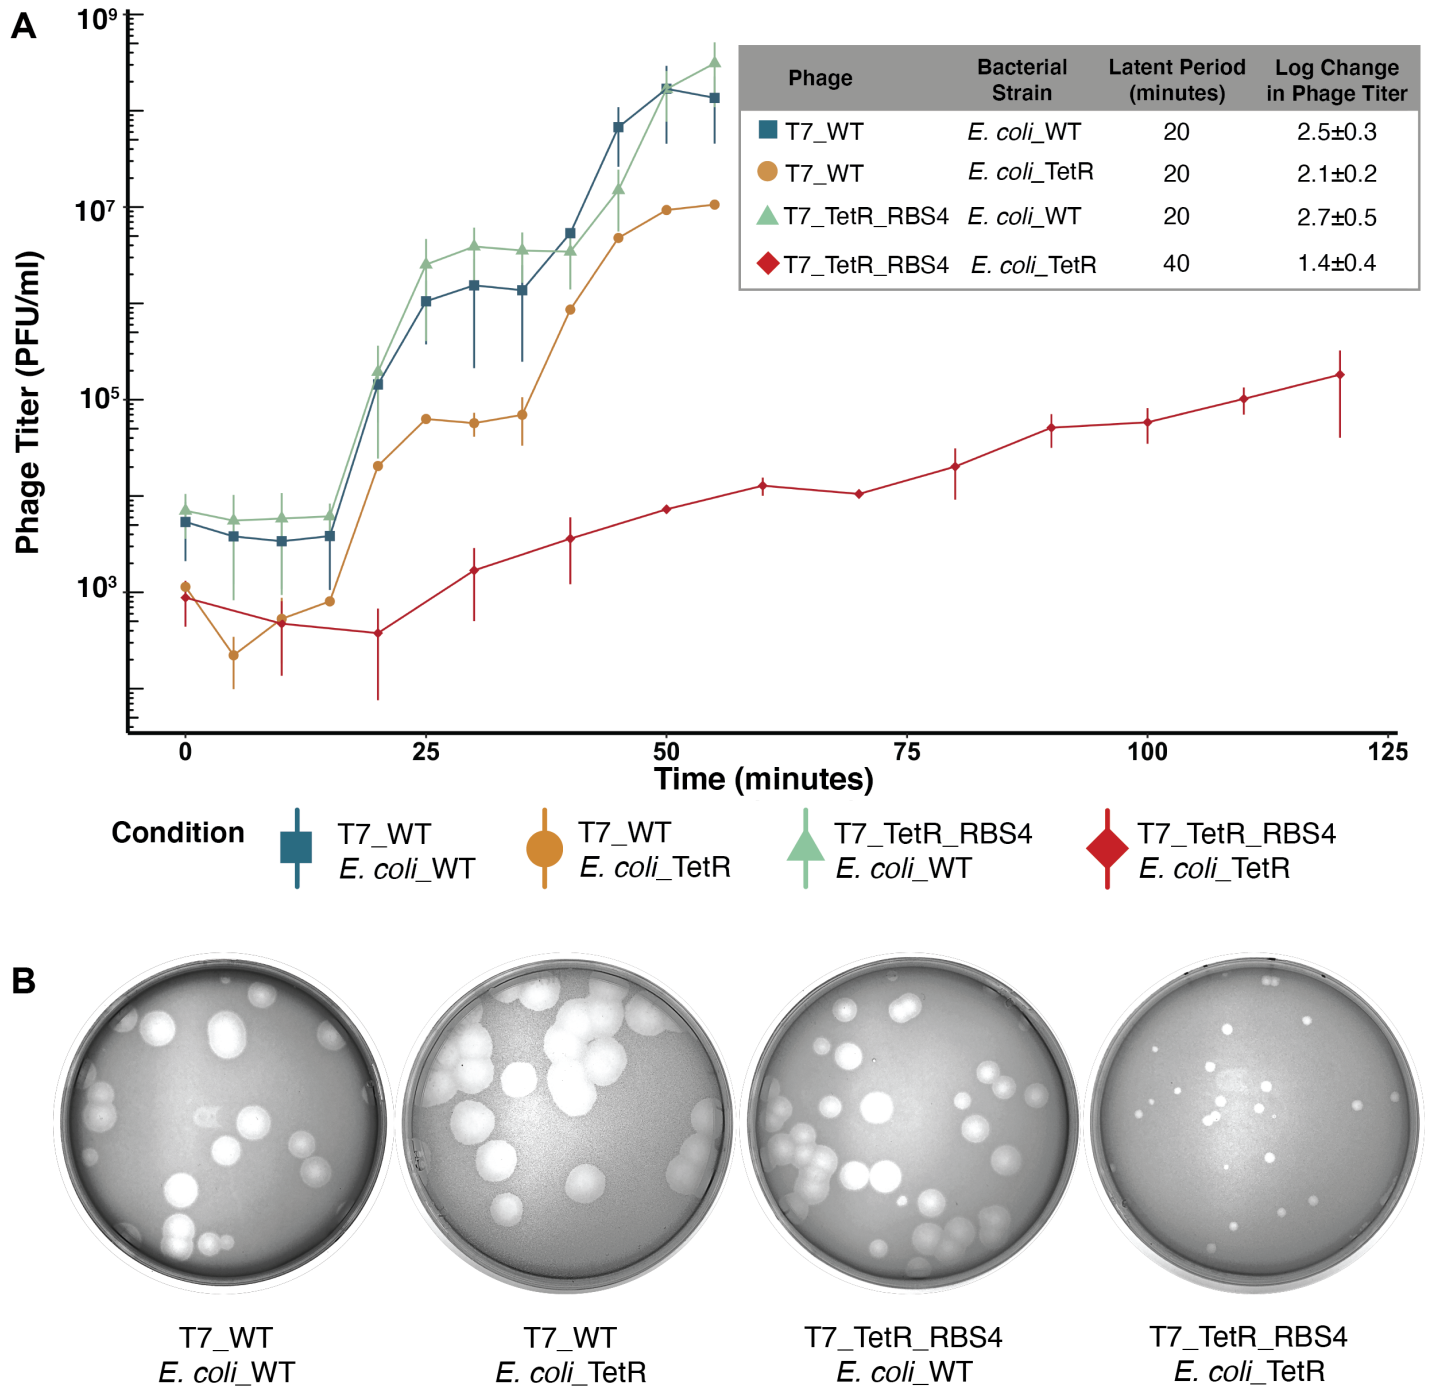

Figure 4. Repression significantly delays replication in engineered phages

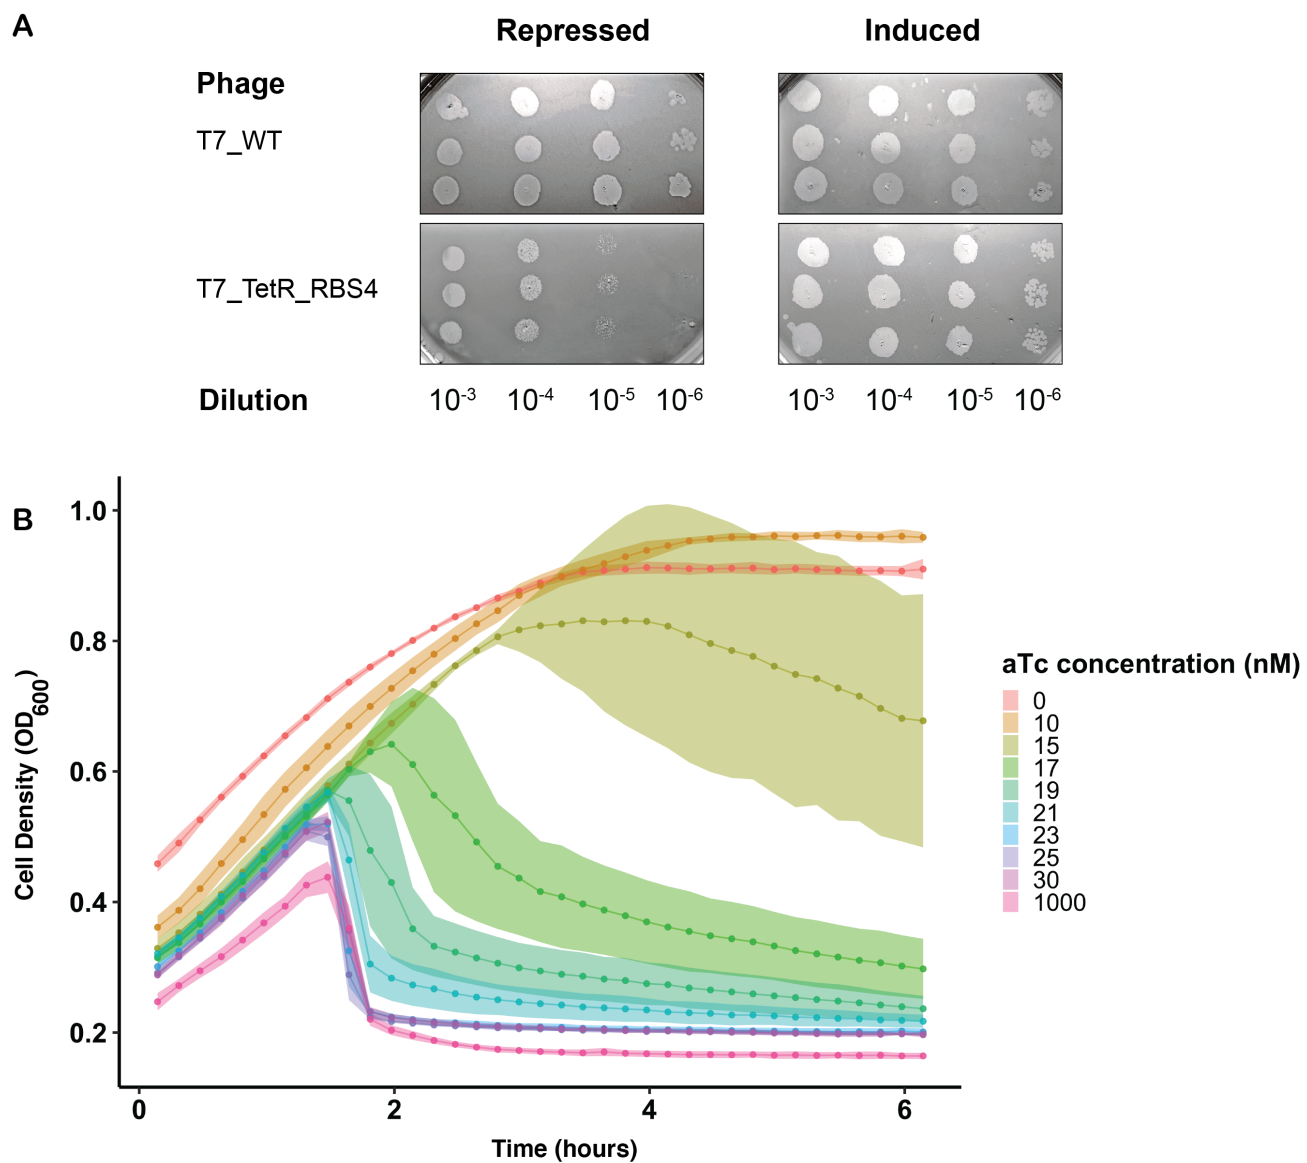

Figure 5. Phage infectivity can be tuned by changing inducer concentration
